# Prediction of the Coding Sequences of Unidentified Human Genes. VI. The Coding Sequences of 80 New Genes (KIAA0201-KIAA0280) Deduced by Analysis of cDNA Clones from Cell Line KG-1 and Brain

Takahiro NAGASE, Naohiko SEKI, Ken-ichi ISHIKAWA, Miki OHIRA, Yutaka KAWARABAYASI, Osamu OHARA,  
Ayako TANAKA, Hirokazu KOTANI, Nobuyuki MIYAJIMA, and Nobuo NOMURA\*  
*Kazusa DNA Research Institute, 1532-3 Yana, Kisarazu, Chiba 292, Japan*

(Received 4 October 1996; revised 24 October 1996)

## Abstract

In this series of projects of sequencing human cDNA clones which correspond to relatively long and nearly full-length transcripts, we newly determined the sequences of 80 clones, and predicted the coding sequences of the corresponding genes, named KIAA0201 to KIAA0280. Among the sequenced clones, 68 were obtained from human immature myeloid cell line KG-1 and 12 from human brain. The average size of the clones was 5.3 kb, and that of distinct ORFs in clones was 2.8 kb, corresponding to a protein of approximately 100 kDa. Computer search against the public databases indicated that the sequences of 22 genes were unrelated to any reported genes, while the remaining 58 genes carried sequences which show some similarities to known genes. Protein motifs that matched those in the PROSITE motif database were found in 25 genes and significant transmembrane domains were identified in 30 genes. Among the known genes to which significant similarity was shown, the genes that play key roles in regulation of developmental stages, apoptosis and cell-to-cell interaction were included. Taking into account of both the search data on sequence similarity and protein motifs, at least seven genes were considered to be related to transcriptional regulation and six genes to signal transduction. When the expression profiles of the cDNA clones were examined with different human tissues, about half of the clones from brain (5 of 11) showed significant tissue-specificity, while approximately 80% of the genes from KG-1 were expressed ubiquitously.

**Key words:** full-length cDNA sequence; mRNA expression; chromosomal location; myeloid cell line KG-1; brain.

## 1. Introduction

To accumulate information on the coding sequences of unidentified human genes, we have begun a project for sequencing the entire cDNA clones which correspond to relatively long and nearly full-length transcripts.<sup>1,2</sup> Whereas many genes of functional importance appear to be expressed in longer transcripts, little effort has been made to analyze such transcripts mostly due to technical difficulties. Although a large amount of expressed sequence-tags (ESTs) obtained by one path sequencing of cDNA libraries have been accumulated for comprehensive understanding of expression profiles, the information obtained is limited to relatively short cDNA species.<sup>3-5</sup> By our sequencing strategy, cDNA libraries enriched with clones corresponding to relatively long transcripts were constructed, and the clones that carry

unreported terminal sequences are first selected. Then, the sizes of the mRNA corresponding to these clones are analyzed by Northern hybridization, and the entire nucleotide sequences of clones that comprised nearly full-length transcripts were determined. We have already predicted the coding sequences of 180 new genes from analysis of cDNA clones which were isolated from human immature myeloid cell line KG-1.<sup>1,2</sup> By computer search, 68 genes were found to be new, and most of the remaining genes (96 genes) were related to those with biologically important function. In this paper, we report the coding sequences of additional 80 genes and their sequence features as well as expression profiles.

## 2. Materials and Methods

The source of the KG-1 cDNA clones was identical to that used in the previous paper.<sup>1</sup> The brain cDNA clones were selected from a cDNA library which was con-

Communicated by Mituru Takanami

\* To whom correspondence should be addressed. Tel. +81-438-52-3930, Fax. +81-438-52-3931

**Figure 1.** Physical maps of the 80 cDNA clones analyzed.

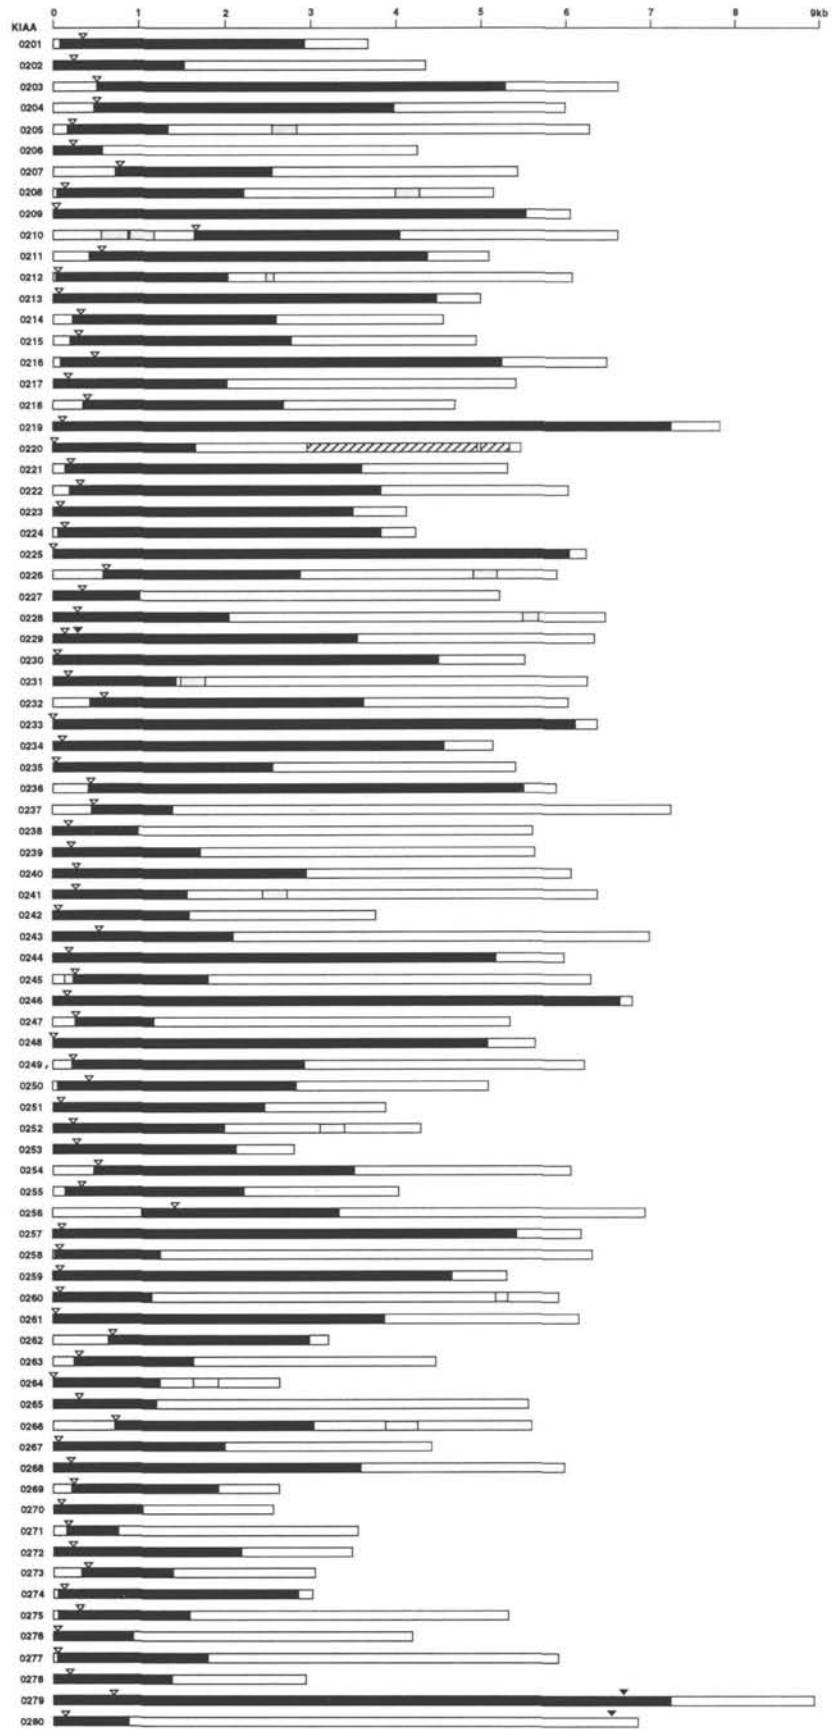

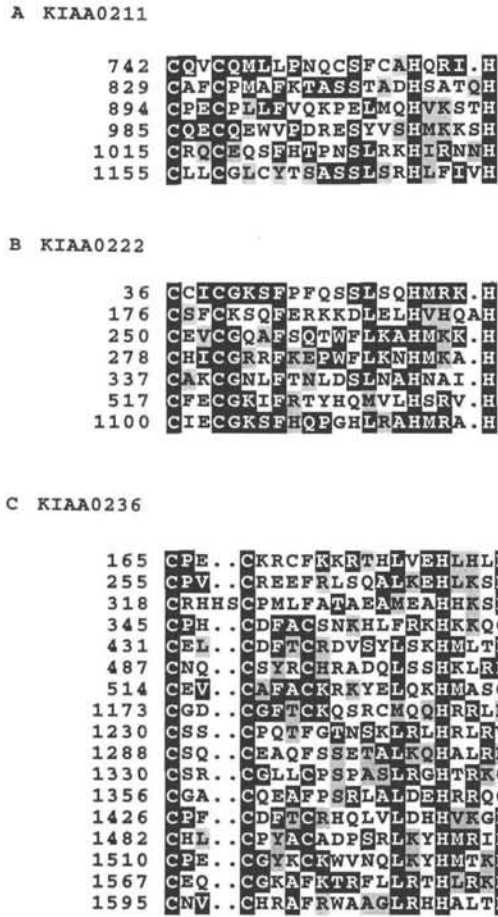

**Figure 2.** Distinct C2H2 type zinc finger repeats in products encoded in genes: **A**, KIAA0211; **B**, KIAA0222 ; **C**, KIAA0236.

structed from a whole brain mRNA fraction of CLONTECH (California, USA) by a method essentially identical to that used for the library of KG-1 cells. The methods used for selection of clones, Northern hybridization, sequence analysis, computer analysis of sequences and chromosomal mapping of cDNA clones were described previously.<sup>1,6</sup>

### 3. Results and Discussion

#### 3.1. Sequence features of analyzed cDNA clones

As in the previous papers,<sup>1,2</sup> the cDNA clones carrying inserts longer than 2 kb were randomly selected from the libraries constructed from the medium-sized cDNA class, and both the terminal sequences were analyzed

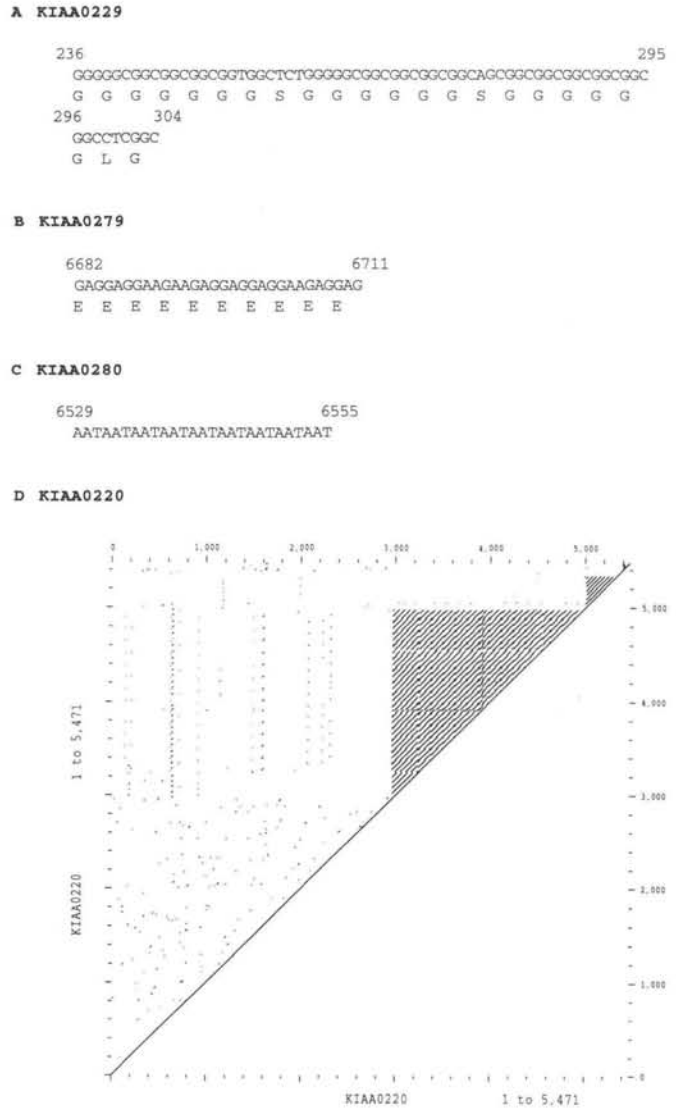

**Figure 3.** Typical repeats observed in cDNA clones from identified genes. **A**, GGC repeats in KIAA0229; **B**, GAG repeats in KIAA0279; **C**, AAT repeats in KIAA0280; **D**, reiteration of two types of 55 nucleotide repeats in KIAA0220. In **A** and **B**, translated amino acids are indicated below the DNA sequences. Numerals above the sequences are nucleotide positions in each clone.

to select unidentified clones with poly(A) tails. The clones harboring inserts more than 90% of the length of the corresponding transcripts were further selected by northern hybridization, and their sequences were determined. Among 85 clones fully sequenced, 80 clones were

**Figure 1.** The horizontal scale represents the cDNA length in kb, and gene numbers are given on the left. Open reading frames (ORFs) within coding regions, untranslated regions, Alu sequences, and other repetitive sequences are indicated by solid, open, dotted, and hatched boxes, respectively. The details of repeats in KIAA0220 are shown in Fig. 3D. The positions of the first ATG codon in each ORF are represented by open triangles. The solid triangles show the positions of the triplet repeats listed in Figs. 3A, B and C. The nucleotide sequence data reported in this paper were deposited in the GSDB, DDBJ, EMBL and NCBI nucleotide sequence databases under the accession numbers shown in Table 3.

**Table 1.** Genes with similarities to nucleotide and amino acid sequence database files.

| Gene no.<br>(KIAA) | Database files                                     | Accession no. <sup>a)</sup> | Identities<br>(%) | Overlap <sup>b)</sup><br>(amino acid<br>residues) |
|--------------------|----------------------------------------------------|-----------------------------|-------------------|---------------------------------------------------|
| 0201               | heat shock protein 105 kD alpha (M)                | D67016                      | 93.4              | 858                                               |
| 0202               | KIAA0128 (H)                                       | D50918                      | 77.7              | 413                                               |
| 0203               | coiled-coil protein CC1 (M)                        | X82318                      | 84.4              | 141                                               |
| 0204               | serine/threonine protein kinase Krs-1 (H)          | U60206                      | 30.5              | 483                                               |
| 0205               | cosmid C01C10 (Ce)                                 | U23526                      | 28.0              | 344                                               |
| 0207               | growth factor receptor-binding protein Grb10(M)    | U18996                      | 90.0              | 428                                               |
| 0208               | dishevelled-3 (M)                                  | U41285                      | 98.7              | 681                                               |
| 0209               | major CRK-binding protein DOCK180 (H)              | D50857                      | 62.3              | 1729                                              |
| 0210               | cosmid B0393 (Ce)                                  | Z37983                      | 39.6              | 345                                               |
| 0211               | finger protein 1 (H)                               | A32891 <sup>c)</sup>        | 23.2              | 343                                               |
| 0212               | cosmid C47E12 (Ce)                                 | Z68882                      | 63.8              | 458                                               |
| 0214               | cosmid ZK1248 (Ce)                                 | U29244                      | 35.2              | 739                                               |
| 0215               | KIAA0239 (H)                                       | D87076                      | 60.4              | 312                                               |
| 0216               | myosin heavy chain (R)                             | S21801 <sup>c)</sup>        | 22.5              | 900                                               |
| 0218               | hypothetical 29.6 kD protein (E)                   | P27859 <sup>d)</sup>        | 30.1              | 204                                               |
| 0219               | translational activator of GCN1 (Sc)               | L12467                      | 32.1              | 1888                                              |
| 0221               | NAM7 (Sc)                                          | P30771 <sup>d)</sup>        | 54.5              | 858                                               |
| 0222               | finger protein MKR3 (M)                            | S03677 <sup>c)</sup>        | 23.9              | 323                                               |
| 0223               | cosmid ZK669 (Ce)                                  | Z37093                      | 30.0              | 274                                               |
| 0224               | putative ATP-dependent RNA helicase K03H1.2 (Ce)   | P34498 <sup>d)</sup>        | 59.3              | 1064                                              |
| 0225               | cosmid K12D12 (Ce)                                 | Z49069                      | 18.7              | 1301                                              |
| 0229               | ankyrin 1 (H)                                      | S08275 <sup>c)</sup>        | 21.7              | 652                                               |
| 0230               | peroxidase precursor (D)                           | U11052                      | 38.0              | 1412                                              |
| 0231               | adenylate cyclase (Sc)                             | S56776 <sup>c)</sup>        | 22.9              | 317                                               |
| 0233               | cosmid T20D3 (Ce)                                  | Z68220                      | 33.9              | 427                                               |
| 0234               | XE169 (H)                                          | L25270                      | 83.9              | 1363                                              |
| 0235               | KIAA0099 (H)                                       | D43951                      | 81.5              | 850                                               |
| 0236               | zinc finger protein ZNF142 (H)                     | U09849                      | 98.8              | 170                                               |
| 0237               | cosmid T10A3 (Ce)                                  | U41035                      | 40.4              | 228                                               |
| 0238               | yolk sac permease-like molecule 1 (M)              | U25739                      | 38.7              | 223                                               |
| 0239               | KIAA0215 (H)                                       | D86969                      | 60.4              | 311                                               |
| 0241               | cosmid T26A5 (Ce)                                  | U00043                      | 45.8              | 164                                               |
| 0242               | hypothetical 51.6kD protein ZK353.8 (Ce)           | P34631 <sup>d)</sup>        | 25.3              | 351                                               |
| 0244               | transcription elongation factor TFIIS (H)          | X57198                      | 29.6              | 161                                               |
| 0245               | amino acid permease PRM1 (Sm)                      | L25068                      | 40.9              | 480                                               |
| 0246               | notch 3 (M)                                        | X74760                      | 27.5              | 299                                               |
| 0248               | protein transport protein SEC7 (Sc)                | P11075 <sup>d)</sup>        | 35.4              | 209                                               |
| 0249               | KIAA0188 (H)                                       | D80010                      | 49.1              | 895                                               |
| 0251               | cosmid C14H10 (Ce)                                 | Z50863                      | 24.0              | 407                                               |
| 0252               | glutamic acid-rich protein precursor (Pf)          | A54514 <sup>c)</sup>        | 18.3              | 503                                               |
| 0255               | 70kD endomembrane protein EMP70 (Sc)               | P32802 <sup>d)</sup>        | 35.2              | 612                                               |
| 0257               | cosmid C27F2 (Ce)                                  | U40419                      | 36.1              | 228                                               |
| 0259               | rad4/cut5 protein (Sp)                             | P32372 <sup>d)</sup>        | 24.4              | 236                                               |
| 0260               | cosmid C52E12 (Ce)                                 | U50135                      | 49.1              | 115                                               |
| 0261               | parallel sister chromatids protein (D)             | U40214                      | 32.0              | 469                                               |
| 0263               | hypothetical protein YD9335.01 (Sc)                | S54638 <sup>c)</sup>        | 30.7              | 197                                               |
| 0266               | hypothetical protein 5 (Sc)                        | S49634 <sup>c)</sup>        | 25.9              | 704                                               |
| 0267               | Na <sup>+</sup> /H <sup>+</sup> exchanger 2 (H)    | A57644 <sup>c)</sup>        | 29.0              | 418                                               |
| 0268               | C219-reactive peptide (H)                          | L34688                      | 100 <sup>e)</sup> | 136                                               |
| 0269               | extensin-like protein (Zm)                         | S49915 <sup>c)</sup>        | 29.9              | 228                                               |
| 0271               | transforming protein bcl-2 (H)                     | C37332 <sup>c)</sup>        | 45.1              | 164                                               |
| 0272               | hypothetical C08B11.7 protein (Ce)                 | Q09444 <sup>d)</sup>        | 33.6              | 294                                               |
| 0274               | hypothetical NO330 protein (Sc)                    | P42837 <sup>d)</sup>        | 35.1              | 655                                               |
| 0275               | testican (H)                                       | S33293 <sup>c)</sup>        | 49.0              | 358                                               |
| 0276               | hypothetical protein L3111 (Sc)                    | S59316 <sup>c)</sup>        | 25.1              | 180                                               |
| 0277               | CDC25 protein homolog (H)                          | L26584                      | 26.4              | 235                                               |
| 0278               | growth factor Arc (R)                              | U19866                      | 92.4              | 396                                               |
| 0279               | cadherin-related tumor suppressor hFat protein (H) | X87241                      | 26.5              | 656                                               |

a) EMBL/NCBI/GSDB/DDBJ database files are shown unless specified.

b) The size of regions which show similarities.

c) PIR database files

d) SWISS-PROT database files

e) A partial sequence spanning aa positions 592 -727 of KIAA0268 has been reported.

Ce, *Caenorhabditis elegans*; D, *Drosophila melanogaster*; E, *Escherichia coli*; H, human; M, mouse; Pf, *Plasmodium falciparum*; R, rat; Sc, *Saccharomyces cerevisiae*; Sm, *Schistosoma mansoni*; Sp, *Schizosaccharomyces pombe*; Zm, *Zea mays*.

**Table 2.** Genes with regions that matched motifs in the PROSITE database.

| Motifs               | Description                                                   | Gene number (KIAA)                               | References |
|----------------------|---------------------------------------------------------------|--------------------------------------------------|------------|
| HSP70 3              | Heat shock hsp70 proteins family                              | 0201                                             | 18         |
| ATP GTP A            | ATP/GTP-binding site motif A (P-loop)                         | 0202, 0212, 0214, 0216<br>0221, 0222, 0224, 0250 | 19         |
| PROTEIN KINASE ST    | Protein kinases                                               | 0204, 0213                                       | 20         |
| PROTEIN KINASE ATP   | Protein kinases                                               | 0204, 0213                                       | 20         |
| ZINC FINGER C2H2     | Zinc finger, C2H2 type                                        | 0211, 0222, 0236                                 | 11         |
| CYTOCHROME C         | Cytochrome c family heme-binding site                         | 0211, 0223                                       | 21         |
| YBL055C-1            | Hypothetical YBL055c/yjjV family                              | 0218                                             | 22         |
| YBL055C-2            | Hypothetical YBL055c/yjjV family                              | 0218                                             | 22         |
| DEAH ATP HELICASE    | DEAD and DEAH box families ATP-dependent helicases            | 0224                                             | 23         |
| IG MHC               | Immunoglobulins and major histocompatibility complex proteins | 0233                                             | 24         |
| GLYCOSYL HYDROL F1 1 | Glycosyl hydrolases family 1                                  | 0237                                             | 25         |
| CYTOCHROME P450      | Cytochrome P450 cysteine heme-iron ligand                     | 0246                                             | 26         |
| EGF                  | EGF-like domain cysteine pattern                              | 0246, 0279                                       | 27         |
| AA TRNA LIGASE II 2  | Aminoacyl-transfer RNA synthetases class-II                   | 0248                                             | 28         |
| ATPASE C             | ATP synthase c subunit                                        | 0256                                             | 29         |
| ATPASE ALPHA BETA    | ATP synthase alpha and beta subunits                          | 0257                                             | 29         |
| ZINC FINGER C3HC4    | Zinc finger, C3HC4 type                                       | 0262                                             | 12         |
| PRENYLATION          | Prenyl group binding site                                     | 0270                                             | 15         |
| BCL2                 | Apoptosis regulator proteins, Bcl-2 family                    | 0271                                             | 9          |
| THYROGLOBULIN 1      | Thyroglobulin type-1 repeat                                   | 0275                                             | 30         |
| CADHERIN             | Cadherins extracellular repeated domain                       | 0279                                             | 10         |

found to contain distinct open reading frames (ORFs) and were subjected to further analysis. The ORFs and the first ATG codon in each ORF are shown in Fig. 1 by solid boxes and open triangles, respectively. In the figure, KIAA0201 to KIAA0268 represent the clones from the KG-1 cDNA library and KIAA0269 to KIAA0280 represent the clones from the brain cDNA library. In-frame termination codons upstream of the first ATG codon were identified in 38 clones, suggesting that at least half of the clones analyzed harbor the complete coding region.

The results of computer analysis with the GCG software package are shown in Tables 1 and 2, Figs. 2, 3 and 4 and in the figure in the Supplement section. Sequence features are summarized below.

- Sequences of 22 genes were unrelated to any reported sequences in the database files, except for ESTs (GenBank release 96.0, August 1996). The remaining 58 genes carried sequences with at least some similarities to known genes (Table 1). The genes that we are particularly noted are as follows. KIAA0208 was a human homolog of mouse *dishevelled-3*<sup>7</sup> and KIAA0246 carried a sequence with considerable similarity to the *Notch* gene family,<sup>8</sup> both of which are known to mediate cell fate decisions during development. KIAA0271 showed significant similarity to the *bcl-2* gene family which plays important roles in apoptosis.<sup>9</sup> KIAA0279 was related to a gene involved in cell-to-cell interaction.<sup>10</sup>
- Protein motifs that matched those in the PROSITE motif database were found in 25 genes (Table 2).
- On the basis of the search data of similarity and protein motifs, at least seven genes were considered to be involved in transcriptional regulation. Those seven genes are KIAA0211, 0215, 0219, 0222, 0236, 0239 and 0262, in which KIAA0211, 0222 and 0236 carried the C2H2 type zinc finger<sup>11</sup> (Fig. 2) and KIAA0262 the C3HC4 type zinc finger.<sup>12</sup>
- The search data of similarity and protein-motifs also suggested 6 genes, KIAA0204, 0209, 0213, 0231, 0277 and 0278, are relating to signal transduction: The product encoded in KIAA0231 harbors a leucine-rich domain with significant structural similarity to that of adenylate cyclase<sup>13</sup> (Fig. 4A), and that of KIAA0277 shows a high degree of sequence similarity to proteins encoded in the *CDC25*, *Sos1* and *Ste6* (Fig. 4B).<sup>14</sup>
- Significant transmembrane domains were identified in 30 genes, 11 of which harbored multiple hydrophobic regions. It is also noted that KIAA0270 harbors a binding site of the prenyl group which is assumed to anchor to membranes.<sup>15</sup>
- Three genes harbored triplet repeats, which were often correlated with genetic disorders:<sup>16</sup> GGC(Gly) repeats occurred 20 times within a 23-triplet stretch in KIAA0229, GAG(Glu) repeats occurred 7 times in a 10-triplet stretch in KIAA0279, and 9 AAT repeats were detected in the 3'-untranslated region (UTR) of KIAA0280 (Figs. 3A, B and C).
- Alu sequences were identified in the 5'-UTRs of 2 genes and in the 3'-UTRs of 12 genes, respectively. The presence of Alu in the 5'-UTR has already been

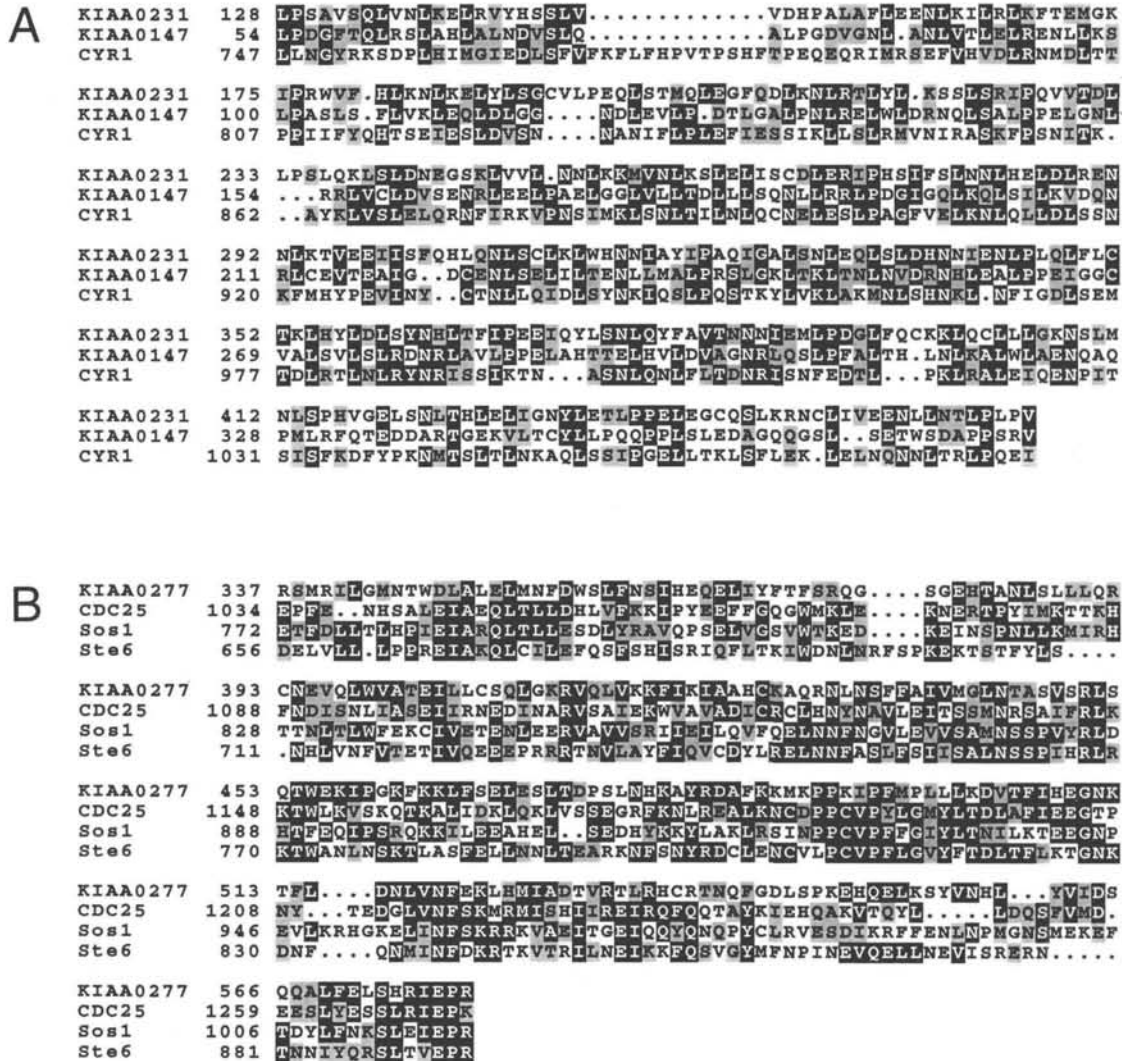

**Figure 4.** Sequence comparison of (A) a leucine-rich domain in adenylate cyclase family and (B) *CDC25* gene family. Identical and similar amino acids are indicated by black and grey shading, respectively. Numerals represent the number of amino acid residues from the start codon.

reported by Yulug et al.<sup>17</sup> Although the mechanism for Alu integration is not fully understood yet, the lower occurrence rate of Alu in the 5'-UTR than 3'-UTR in cDNAs may be due to differences in the target size for Alu retroposition. It should be noted that the Alu sequence at the 5'-UTR of KIAA0245 overlaps the ORF, but as the first ATG in the ORF is present downstream of Alu, the Alu sequence does not seem to be translated.

- Two repeated sequences, both of which are 55 nucleotides long, were found in KIAA0220 (Fig. 3D). They were reiterated 32 and 8 times, respectively, in the 3'-UTR of KIAA0220.

### 3.2. Expression profiles in tissues

The expression profiles of the sequenced genes were examined with 16 different human tissues and 2 cell lines including the KG-1 cell, and clear patterns were obtained for all but two clones. The results are summarized in Table 3. Seventy-nine percent (53 out of 67) of clones from the KG-1 cells and 36% (4 out of 11) of those from brain were found to be expressed ubiquitously, albeit to varying degrees, in all the tissues examined. Five out of 11 clones (45%) from brain were expressed specifically, if not exclusively, in brain. The patterns of two representative clones are shown in Figs. 5A and B. This is in sharp contrast to the fact that most of KG-1 clones exhibited ubiquitous expression. It was also noted that 10

**Table 3.** Summary of cDNA sequence data and expression patterns of identified genes in human tissues and cell lines.

| Gene number<br>(KIAA) | Total length<br>of cDNA<br>(bp) <sup>a)</sup> | Amino<br>acid<br>residues | Expression <sup>b)</sup> |      |      |      |      |      |      |      |      |      |      |      |      |      |      |      |         | Chromosomal <sup>c)</sup><br>location | Accession <sup>d)</sup><br>number |
|-----------------------|-----------------------------------------------|---------------------------|--------------------------|------|------|------|------|------|------|------|------|------|------|------|------|------|------|------|---------|---------------------------------------|-----------------------------------|
|                       |                                               |                           | KG-1                     | HeLa | He   | Br   | PI   | Lu   | Li   | Sk.m | Kf   | Pa   | Sp   | Th   | Pr   | Te   | Ov   | Sm.i | Co      |                                       |                                   |
| 0201 <sup>f,g</sup>   | 3,614                                         | 858                       | +                        | +/-  | +    | ++   | +    | ++   | +/-  | +    | +    | +    | -    | -    | ++   | +    | +    | +    | +       | 13                                    | D86956                            |
| 0202 <sup>f,g</sup>   | 4,344                                         | 508                       | +                        | +    | +/-  | ++   | ++   | ++   | +    | +    | +++  | +    | +    | +    | +    | +/-  | +    | +    | +       | 6                                     | D86957                            |
| 0203 <sup>e,f</sup>   | 6,614                                         | 1,591                     | +                        | +    | +    | +    | +    | -    | -    | -    | +    | +    | +    | +    | +    | +    | +    | +    | 8,20,21 | D86958                                |                                   |
| 0204 <sup>f,g</sup>   | 5,988                                         | 1,152                     | +                        | +    | +    | +    | +    | +    | +    | ++   | ++   | +    | +    | +    | +    | +    | +    | +    | 10      | D86959                                |                                   |
| 0205 <sup>e,f</sup>   | 6,253                                         | 370                       | +                        | +    | +    | +    | +    | +    | +    | +    | +    | +    | +    | +    | +    | -    | +    | +/-  | 1,13    | D86960                                |                                   |
| 0206 <sup>e</sup>     | 4,249                                         | 193                       | +                        | +    | +/-  | -    | +    | +    | +    | +    | +    | +    | +    | +    | +    | +    | +    | +    | 5,11    | D86961                                |                                   |
| 0207 <sup>f</sup>     | 5,431                                         | 588                       | +                        | ++   | -    | +/-  | +    | +    | +    | +    | +    | +    | +    | +    | +    | +    | +    | -    | 7       | D86962                                |                                   |
| 0208 <sup>f</sup>     | 5,146                                         | 693                       | ++                       | ++   | +    | +    | ++   | ++   | ++   | ++   | ++   | ++   | ++   | ++   | ++   | ++   | ++   | ++   | 3       | D86963                                |                                   |
| 0209 <sup>f</sup>     | 6,050                                         | 1,842                     | +                        | -    | -    | -    | +    | ++   | +    | -    | ++   | ++   | -    | -    | ++   | ++   | -    | +++  | 6       | D86964                                |                                   |
| 0210 <sup>e,f</sup>   | 6,611                                         | 795                       | +                        | +    | +/-  | +    | +    | ++   | +    | +    | ++   | +    | +    | +    | +    | +    | +    | +    | 3       | D86965                                |                                   |
| 0211 <sup>f,g</sup>   | 5,086                                         | 1,267                     | +                        | +    | +++  | +    | +    | +    | +    | +++  | +    | +    | +    | +    | +    | +    | +    | +    | 15,18   | D86966                                |                                   |
| 0212 <sup>e,f,g</sup> | 6,072                                         | 657                       | ++                       | +    | +    | +    | +    | +    | ++   | -    | ++   | ++   | +    | +    | ++   | ++   | +    | +    | 3       | D86967                                |                                   |
| 0213 <sup>g</sup>     | 4,990                                         | 1,491                     | +                        | -    | +    | +    | +    | +    | +    | +    | +    | +    | +    | +    | +    | +    | +    | +    | 6       | D86968                                |                                   |
| 0214 <sup>e,f,g</sup> | 4,550                                         | 757                       | +                        | +    | +++  | +    | +    | +    | +    | +++  | +    | +    | +    | +    | +    | +    | +    | +    | 1       | D86987                                |                                   |
| 0215 <sup>f</sup>     | 4,935                                         | 823                       | +                        | +    | +    | +    | +    | +    | +    | +    | +    | +    | +    | +    | +    | +    | +    | +    | 3,X     | D86969                                |                                   |
| 0216 <sup>f,g</sup>   | 6,479                                         | 1,581                     | +                        | +    | +    | +    | +    | +    | +    | +++  | +    | +    | +    | +    | +    | +    | +    | +    | 17      | D86970                                |                                   |
| 0217                  | 5,404                                         | 673                       | +                        | +    | +    | +    | +    | +    | +    | +    | +    | +    | +    | +    | +    | +    | +    | +    | 10      | D86971                                |                                   |
| 0218 <sup>f,g</sup>   | 4,689                                         | 761                       | +                        | +    | +    | +    | +    | ++   | +    | +    | +    | +    | ++   | +    | +    | ++   | +    | ++   | 3       | D86972                                |                                   |
| 0219 <sup>e,f</sup>   | 7,819                                         | 2,412                     | +                        | -    | +    | +/-  | +    | +    | ++   | +    | +    | +    | +    | +    | +    | +    | +    | +    | 6,12    | D86973                                |                                   |
| 0220                  | 5,471                                         | 553                       | +                        | n.d. | n.d. | n.d. | n.d. | n.d. | n.d. | n.d. | n.d. | n.d. | n.d. | n.d. | n.d. | n.d. | n.d. | n.d. | 14,16   | D86974                                |                                   |
| 0221 <sup>f,g</sup>   | 5,311                                         | 1,129                     | +                        | +    | +    | +    | +    | +    | +    | +    | +    | +    | +    | +    | +    | +    | +    | +    | 19      | D86988                                |                                   |
| 0222 <sup>f,g</sup>   | 6,033                                         | 1,163                     | +                        | -    | +    | +    | +    | +    | +    | +    | +    | +    | +    | +    | ++   | +    | +    | -    | 18      | D86975                                |                                   |
| 0223 <sup>f,g</sup>   | 4,121                                         | 1,165                     | ++                       | -    | ++   | +    | +    | +    | +    | +    | +    | ++   | ++   | +    | +    | +    | +    | ++   | 19      | D86976                                |                                   |
| 0224 <sup>f,g</sup>   | 4,226                                         | 1,227                     | +                        | -    | +    | +    | +    | +    | +    | +    | -    | +    | +    | +    | ++   | +    | +    | +    | 16      | D86977                                |                                   |
| 0225 <sup>e,f</sup>   | 6,237                                         | 2,013                     | +                        | ++   | +    | +    | +    | +    | +    | +    | +    | +    | +    | +    | +    | +    | +    | +    | 7       | D86978                                |                                   |
| 0226 <sup>e</sup>     | 5,891                                         | 751                       | +                        | +    | +    | +    | +    | +    | +/-  | +    | +    | +    | +    | +    | +    | +    | +    | +    | 3       | D86979                                |                                   |
| 0227                  | 5,217                                         | 336                       | ++                       | ++   | ++   | +    | +    | +    | ++   | ++   | ++   | ++   | ++   | ++   | ++   | ++   | ++   | ++   | 14      | D86980                                |                                   |
| 0228 <sup>e</sup>     | 6,465                                         | 681                       | +                        | +    | +    | +    | +    | n.d. | +    | +    | +    | +    | +    | +    | +    | +    | +    | +    | 17      | D86981                                |                                   |
| 0229 <sup>f</sup>     | 6,335                                         | 1,180                     | +++                      | +++  | +++  | +    | +    | +    | +++  | +    | +++  | +    | +    | +    | +    | +    | +    | +    | 6       | D86982                                |                                   |
| 0230 <sup>e,f</sup>   | 5,510                                         | 1,496                     | +                        | +    | ++   | -    | ++   | ++   | +    | +    | +    | +    | +    | +    | +    | ++   | +    | -    | 2       | D86983                                |                                   |
| 0231 <sup>f</sup>     | 6,248                                         | 476                       | +                        | +    | +/-  | +    | +/-  | +/-  | +/-  | +/-  | +/-  | +/-  | +    | +    | +    | +    | +    | +    | 1       | D86984                                |                                   |
| 0232                  | 6,025                                         | 1,008                     | +                        | +    | ++   | +    | +    | +    | ++   | +    | +    | +    | +    | +    | +    | +    | +    | +    | 4       | D86985                                |                                   |
| 0233 <sup>e,f,g</sup> | 6,368                                         | 2,035                     | +                        | +    | +    | +/-  | +    | +    | +    | +    | +    | +    | +    | +    | +    | +    | +    | ++   | 16      | D87071                                |                                   |
| 0234 <sup>f</sup>     | 5,134                                         | 1,482                     | +                        | +    | +    | +    | +    | +    | +    | -    | +    | ++   | +    | +    | +    | +    | +    | +    | Y       | D87072                                |                                   |
| 0235 <sup>f</sup>     | 5,399                                         | 850                       | ++                       | ++   | +    | +    | +    | +    | +    | +    | +    | +    | +    | +    | +    | +    | +    | +    | 2       | D87078                                |                                   |
| 0236 <sup>f,g</sup>   | 5,878                                         | 1,687                     | +                        | +    | +    | +    | +    | +    | ++   | +    | +    | +    | +    | ++   | +    | +    | +    | +    | 2*      | D87073                                |                                   |
| 0237 <sup>f,g</sup>   | 7,239                                         | 308                       | +                        | -    | ++   | +    | +    | +    | +    | +    | +    | +    | +    | +    | +    | +    | +    | +    | 1*      | D87074                                |                                   |
| 0238 <sup>e,f</sup>   | 5,608                                         | 330                       | +                        | +    | +    | +    | +    | +    | +    | +    | +    | +    | +    | +    | +    | +    | +    | +    | 20*     | D87075                                |                                   |
| 0239 <sup>f</sup>     | 5,630                                         | 571                       | +                        | +    | ++   | ++   | ++   | ++   | ++   | ++   | ++   | ++   | ++   | ++   | ++   | ++   | ++   | ++   | 5       | D87076                                |                                   |
| 0240                  | 6,060                                         | 983                       | +                        | +    | ++   | ++   | ++   | ++   | ++   | ++   | ++   | ++   | ++   | ++   | ++   | ++   | ++   | ++   | 6*      | D87077                                |                                   |
| 0241 <sup>f</sup>     | 6,371                                         | 522                       | +                        | +    | +    | +    | +    | +    | +    | +    | +    | +    | +    | +    | +    | +    | +    | +    | 7*      | D87682                                |                                   |
| 0242 <sup>e,f</sup>   | 3,760                                         | 529                       | +                        | +    | +    | +    | +    | +    | ++   | ++   | +    | +    | +    | +    | +    | +    | +    | +    | 2*      | D87684                                |                                   |
| 0243                  | 6,984                                         | 699                       | +                        | +    | +    | +    | +    | +    | -    | +    | -    | +    | +    | +    | +    | +    | +    | +/-  | 9*      | D87683                                |                                   |
| 0244 <sup>f</sup>     | 5,975                                         | 1,723                     | +                        | +    | +    | +    | +    | +    | +    | +    | +    | +    | +    | +    | +    | +    | +    | +    | 6*      | D87685                                |                                   |
| 0245 <sup>e,f</sup>   | 6,296                                         | 515                       | +                        | +    | +    | +    | +    | +    | +    | +    | +/-  | ++   | +    | +    | +    | +    | +    | +    | 16*     | D87432                                |                                   |
| 0246 <sup>e,f,g</sup> | 6,777                                         | 2,212                     | +                        | +    | -    | -    | ++   | +    | +    | +    | +/-  | ++   | +/-  | +/-  | +    | +    | -    | ++   | 3*      | D87433                                |                                   |
| 0247 <sup>e</sup>     | 5,338                                         | 303                       | +                        | +    | +    | +    | +    | +    | +    | +    | +/-  | +    | +    | +    | +    | +    | +/-  | +    | 14*     | D87434                                |                                   |
| 0248 <sup>e,f,g</sup> | 5,634                                         | 1,691                     | +                        | +    | +    | +    | +    | +    | ++   | +    | +    | +    | +    | +    | +    | +    | +    | +    | 10*     | D87435                                |                                   |
| 0249 <sup>f</sup>     | 6,219                                         | 896                       | +                        | +    | +    | +    | +    | +    | +/-  | ++   | +    | +    | +    | +    | +    | +    | +/-  | +    | 18*     | D87436                                |                                   |
| 0250 <sup>e,g</sup>   | 5,082                                         | 802                       | +                        | +    | +    | +    | +    | +    | ++   | +    | +    | +    | +    | +    | +    | +    | +    | +    | 1*      | D87437                                |                                   |
| 0251 <sup>f</sup>     | 3,875                                         | 820                       | +                        | +    | +    | +    | +    | +    | +    | +    | +    | +    | +    | +    | +    | +    | +    | +    | 16*     | D87438                                |                                   |
| 0252 <sup>f</sup>     | 4,288                                         | 664                       | +                        | +    | +    | +    | +    | +    | ++   | +    | +    | +    | +    | +    | +    | +    | +    | +    | 15*     | D87440                                |                                   |
| 0253 <sup>e</sup>     | 2,805                                         | 708                       | +                        | +    | ++   | ++   | ++   | ++   | ++   | ++   | ++   | ++   | ++   | ++   | ++   | ++   | ++   | ++   | 1*      | D87442                                |                                   |
| 0254 <sup>e</sup>     | 6,049                                         | 992                       | +                        | -    | +    | +    | +    | +    | +    | +    | +    | +    | +    | +    | +    | +    | +    | +    | 11*     | D87443                                |                                   |
| 0255 <sup>e,f</sup>   | 4,028                                         | 625                       | +                        | +    | +    | +    | +    | +    | +    | +    | +    | +    | +    | +    | +    | +    | +    | +    | 20      | D87444                                |                                   |
| 0256 <sup>g</sup>     | 6,935                                         | 635                       | +                        | +/-  | +    | +    | +    | +    | +    | +    | +    | +    | +    | +    | +    | +    | +    | +/-  | 15*     | D87445                                |                                   |
| 0257 <sup>e,f,g</sup> | 6,178                                         | 1,805                     | +                        | +    | +    | +    | +    | +    | ++   | +    | +    | +    | +    | +    | +    | +    | +    | +    | 2*      | D87446                                |                                   |
| 0258                  | 6,313                                         | 391                       | +                        | -    | +    | +    | +    | +    | +    | +    | +    | +    | +    | +    | +    | +    | +    | +    | 9*      | D87447                                |                                   |
| 0259 <sup>f</sup>     | 5,298                                         | 1,550                     | +                        | +/-  | +    | +    | +    | +    | +    | +    | +    | +    | +    | ++   | +    | +    | +    | +    | 3*      | D87448                                |                                   |
| 0260 <sup>e,f</sup>   | 5,918                                         | 383                       | +                        | +    | +    | +/-  | +    | +    | ++   | +    | +    | +    | +    | +    | +    | +    | +    | +    | 1*      | D87449                                |                                   |
| 0261 <sup>f</sup>     | 6,155                                         | 1,287                     | +                        | +    | +/-  | +/-  | +    | +    | +    | +    | +    | +    | +    | +    | +    | +    | +    | +/-  | 10*     | D87450                                |                                   |
| 0262 <sup>g</sup>     | 3,205                                         | 761                       | ++                       | ++   | +++  | +    | +    | +    | +++  | +    | ++   | +    | +    | ++   | +    | +    | +    | +    | 12*     | D87451                                |                                   |
| 0263 <sup>f</sup>     | 4,461                                         | 441                       | +                        | +    | +    | +    | +    | +    | +    | +    | +    | +    | +    | ++   | +    | +    | +    | +    | 3*      | D87452                                |                                   |
| 0264                  | 2,635                                         | 415                       | ++                       | ++   | +++  | +    | +    | +    | +++  | +    | +    | +    | +    | +    | +    | +    | +    | +    | 5*      | D87453                                |                                   |
| 0265                  | 5,551                                         | 401                       | +                        | +    | +    | +    | +    | n.d. | ++   | +    | +    | +    | +    | +    | +    | +    | +    | +    | 7*      | D87454                                |                                   |
| 0266 <sup>f</sup>     | 5,585                                         | 766                       | +                        | +    | +    | +    | +    | +    | n.d. | +    | +    | +    | +    | +    | +    | +    | +    | +    | 13*     | D87455                                |                                   |
| 0267 <sup>e,f</sup>   | 4,408                                         | 666                       | +                        | +    | +    | ++   | +    | +    | ++   | +    | +    | +    | +    | +    | +    | +    | +    | +    | X*      | D87743                                |                                   |
| 0268 <sup>e,f</sup>   | 5,976                                         | 1,193                     | +                        | +    | +    | +    | +    | +    | +    | +    | +    | +    | +    | ++   | +    | +    | +    | +    | 1*      | D87742                                |                                   |
| 0269 <sup>f</sup>     | 2,625                                         | 559                       | -                        | -    | -    | +++  | -    | -    | -    | +/-  | +/-  | -    | +/-  | -    | ++   | +    | +/-  | +/-  | 6*      | D87459                                |                                   |
| 0270 <sup>g</sup>     | 2,552                                         | 345                       | +                        | +    | +    | ++   | +    | +    | +    | +    | +    | +    | +    | +    | +    | ++   | +    | +    | 19*     | D87460                                |                                   |
| 0271 <sup>e,f,g</sup> | 3,542                                         | 193                       | +                        | +    | +++  | +++  | +    | +    | +    | +    | +++  | +    | +    | ++   | ++   | +    | +    | ++   | 14*     | D87461                                |                                   |
| 0272 <sup>f</sup>     | 3,474                                         | 726                       | +                        | +    | ++   | ++   | +    | +    | +++  | +    | +    | +    | +    | +++  | +    | ++   | ++   | ++   | 3*      | D87462                                |                                   |
| 0273                  | 3,040                                         | 330                       | -                        | -    | -    | +++  | -    | -    | -    | -    | -    | -    | -    | +/-  | +    | +/-  | +/-  | -    | 8*      | D87463                                |                                   |
| 0274 <sup>e,f</sup>   | 3,010                                         | 907                       | +                        | +    | +    | +    | +    | +    | +    | +    | +    | +    | +    | ++   | +    | +    | +    | +    | 6*      | D87464                                |                                   |
| 0275 <sup>e,f,g</sup> | 5,316                                         | 424                       | +                        | +    | +    | ++   | +/-  | +    | +    | +    | -    | ++   | +/-  | +    | +    | +    | -    | ++   | 10*     | D87465                                |                                   |
| 0276 <sup>f</sup>     | 4,185                                         | 309                       | n.d.                     | n.d. | n.d. | +    | n.d. | n.d. | n.d. | n.d. | n.d. | n.d. | n.d. | n.d. | n.d. | n.d. | n.d. | n.d. | 4*      | D87466                                |                                   |

Downloaded from https://academic.oup.com/dnaresearch/article/3/5/321/370498 by guest on 24 April 2024

Table 3. Continued.

| Gene number (KIAA)     | Total length of cDNA (bp) <sup>a)</sup> | Amino acid residues | Expression <sup>b)</sup> |      |     |    |     |     |    |      |     |     |    |    |     | Chromosomal location <sup>c)</sup> | Accession number <sup>d)</sup> |     |     |        |
|------------------------|-----------------------------------------|---------------------|--------------------------|------|-----|----|-----|-----|----|------|-----|-----|----|----|-----|------------------------------------|--------------------------------|-----|-----|--------|
|                        |                                         |                     | KG-1                     | HeLa | He  | Br | Pl  | Lu  | Li | Sk.m | Ki  | Pa  | Sp | Th | Pr  |                                    |                                | Te  | Ov  | Sm.i   |
| 0277 <sup>f)</sup>     | 5,900                                   | 580                 | -                        | -    | +/- | +  | +/- | +/- | -  | -    | +/- | +   | -  | +  | -   | +/-                                | -                              | -   | 7*  | D87467 |
| 0278 <sup>f)</sup>     | 2,935                                   | 460                 | -                        | -    | +   | +  | -   | +   | -  | +    | -   | +   | -  | +  | +   | +/-                                | +/-                            | +/- | 8*  | D87468 |
| 0279 <sup>e,f,g)</sup> | 8,924                                   | 2,408               | -                        | -    | +/- | ++ | -   | -   | -  | +    | +   | +/- | -  | -  | +++ | -                                  | -                              | +/- | 1*  | D87469 |
| 0280                   | 6,837                                   | 291                 | +                        | +    | +   | +  | +   | +   | +  | +    | +   | +   | +  | +  | +   | +                                  | +                              | +   | 11* | D87470 |

n.d., not determined; He, heart; Br, brain; Pl, placenta; Lu, lung; Li, liver; Sk.m., skeletal muscle; Ki, kidney; Pa, pancreas; Sp, spleen; Th, thymus; Pr, prostate; Te, testis; Ov, ovary; Sm.i, small intestine; Co, colon; Pe.b, peripheral blood leukocytes.

a) Values excluding poly(A) sequences.

b) Expression of mRNA in indicated cells and human tissues (Clontech, USA) was examined by northern hybridization, and the strength of the positive signals are indicated (+/-, +, ++, +++).

c) Asterisks indicate that chromosome localization has been determined only by radiation hybrid mapping. In the others, the panels of both radiation hybrid and human-rodent hybrid were used.

d) Accession number of GSDB, DDBJ, EMBL and NCBI nucleotide sequence databases.

e) Putative transmembrane domains were contained (see Supplemental pages).

f) Similarities to known genes were identified (see Table 1 and Supplemental pages).

g) Protein motifs were recognized (see Table 2 and Supplemental pages).

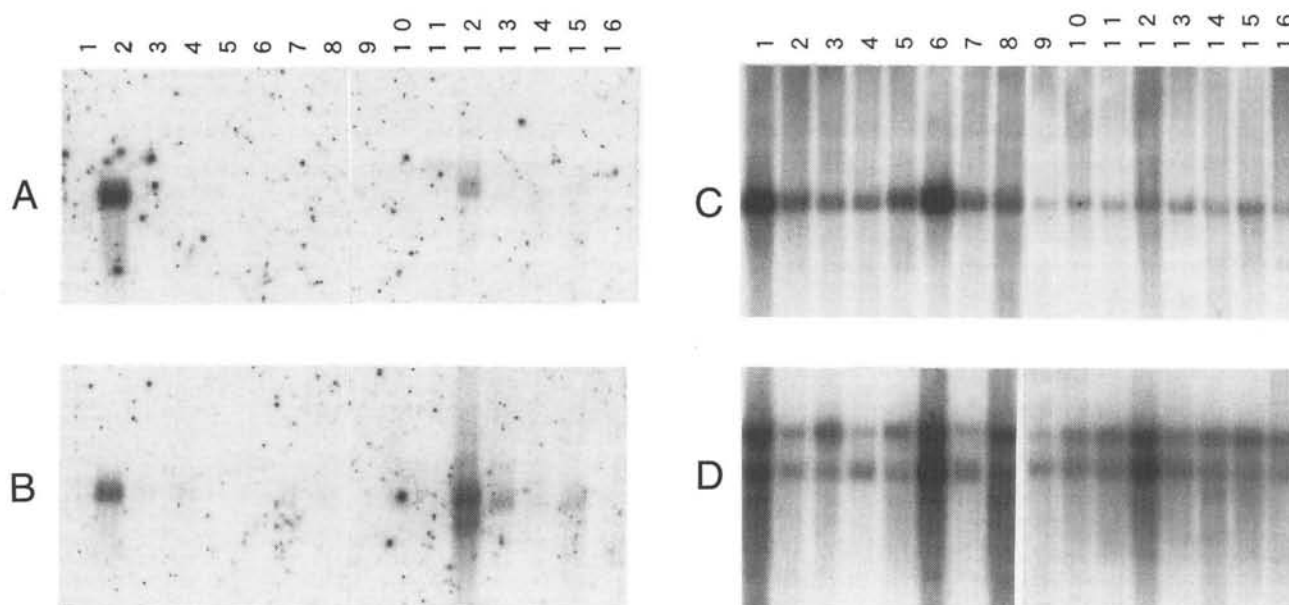

**Figure 5.** The typical expression patterns of representative genes. cDNA fragments were randomly labeled and hybridization was carried out as described previously. Human MTN blots were purchased from CLONTECH Laboratories, Inc.. **A**, KIAA0273; **B**, KIAA0269; **C**, KIAA0264; **D**, KIAA0262. Lane 1, heart; 2, brain; 3, placenta; 4, lung; 5, liver; 6, skeletal muscle; 7, kidney; 8, pancreas; 9, spleen; 10, thymus; 11, prostate; 12, testis; 13, ovary; 14, small intestine; 15, colon; 16, peripheral blood leukocyte.

clones yielded relatively strong signals in both heart and skeletal muscle (as shown in Figs. 5C and D, lanes 1 and 6).

The chromosomal location of these genes has been determined by the panels of radiation hybrid<sup>6</sup> and/or human-rodent hybrid cell lines (see Table 3).<sup>1</sup>

**Acknowledgments:** This project was supported by grants from the Kazusa DNA Research Institute Foundation.

## References

1. Nomura, N., Miyajima, N., Sazuka, T. et al. 1994, Prediction of the coding sequences of unidentified human genes. I. The coding sequences of 40 new genes (KIAA0001-KIAA0040) deduced by analysis of randomly sampled cDNA clones from human immature myeloid cell line KG-1, *DNA Res.*, **1**, 27-35, Supplement; **1**, 47-56.
2. Nagase, T., Seki, N., Ishikawa, K.-i., Tanaka, A., and Nomura, N. 1996, Prediction of the coding sequences of unidentified human genes. V. The coding sequences of 40 new genes (KIAA0161-KIAA0200) deduced by analysis of cDNA clones from human cell line KG-1, *DNA Res.*, **3**,



- 17–24, Supplement; **3**, 43–53.
3. Adams, M. D., Kerlavage, A. R., Fleischmann, R. D. et al. 1995, Initial assessment of human gene diversity and expression patterns based upon 83 million nucleotides of cDNA sequence, *Nature*, **377** (Supplement), 3–174.
  4. Houlgatte, R., Mariage-Samson, R., Duprat, S. et al. 1995, The Genexpress Index: A resource for gene discovery and the genic map of the human genome, *Genome Res.*, **5**, 272–304.
  5. Okubo, K., Hori, N., Matoba, R. et al. 1992, Large scale cDNA sequencing for analysis of quantitative and qualitative aspects of gene expression, *Nature Genet.*, **2**, 173–179.
  6. Schuler, G. D., Boguski, M. S., Stewart, E. A. et al. 1996, A gene map of the human genome, *Science*, **274**, 540–546.
  7. Sussman, D. J., Klingensmith, J., Salinas, P., Adams, P. S., Nusse, R., and Perrimon, N. 1994, Isolation and characterization of a mouse homolog of the *Drosophila* segment polarity gene *dishevelled*, *Dev. Biol.*, **166**, 73–86.
  8. Fortini, M. E. and Artavanis-Tsakonas, S. 1993, *Notch*: Neurogenesis is only part of the picture, *Cell*, **75**, 1245–1247.
  9. Kiefer, M. C., Brauer, M. J., Powers, V. C. et al. 1995, Modulation of apoptosis by the widely distributed Bcl-2 homologue Bak, *Nature*, **374**, 736–739.
  10. Takeichi, M. 1990, Cadherins: A molecular family important in selective cell adhesion, *Annu. Rev. Biochem.*, **59**, 237–252.
  11. Rosenfeld, R. and Margalit, H. 1993, Zinc fingers: conserved properties that can distinguish between spurious and actual DNA-binding motifs, *J. Biomol. Struct. Dyn.*, **11**, 557–570.
  12. Haupt, Y., Alexander, W. S., Barri, G., Klinken, S. P., and Adams, J. M. 1991, Novel zinc finger gene implicated as *myc* collaborator by retrovirally accelerated lymphomagenesis in *Eμ-myc* transgenic mice, *Cell*, **65**, 753–763.
  13. Kataoka, T., Broek, D., and Wigler, M. 1985, DNA sequence and characterization of the *S. cerevisiae* gene encoding adenylate cyclase, *Cell*, **43**, 493–505.
  14. Sadhu, K., Reed, S. I., Richardson, H., and Russell, P. 1990, Human homolog of fission yeast *cdc25* mitotic inducer is predominantly expressed in  $G_2$ , *Proc. Natl. Acad. Sci. USA*, **87**, 5139–5143.
  15. Lowy, D. R. and Willumsen, B. M. 1989, New clue to ras lipid glue, *Nature*, **341**, 384–385.
  16. Mandel, J.-L. 1994, Trinucleotide diseases on the rise, *Nature Genet.*, **7**, 453–455.
  17. Yulug, I. G., Yulug, A., and Fisher, E. M. C. 1995, The frequency and position of *Alu* repeats in cDNAs, as determined by database searching, *Genomics*, **27**, 544–548.
  18. Pelham, H. R. B. 1986, Speculations on the functions of the major heat shock and glucose-regulated proteins, *Cell*, **46**, 959–961.
  19. Walker, J. E., Saraste, M., Runswick, M. J., and Gay, N. J. 1982, Distantly related sequences in the  $\alpha$ - and  $\beta$ -subunits of ATP synthase, myosin, kinases and other ATP-requiring enzymes and a common nucleotide binding fold, *EMBO J.* **1**, 945–951.
  20. Hunter, T. 1991, Protein Kinase Classification, In: Hunter, T., Sefton, B. M. (eds) *Methods in Enzymology*, Vol. 200. Academic Press, New York, pp. 3–37.
  21. Mathews, F. S. 1985, The structure, function and evolution of cytochromes, *Prog. Biophys. Mol. Biol.*, **45**, 1–56.
  22. Bairoch, A. and Rudd, K. E. 1995, unpublished observations.
  23. Linder, P., Lasko, P., Ashburner, M. et al. 1989, Birth of the DEAD box, *Nature*, **337**, 121–122.
  24. Beck, S. and Barrell, B. G. 1988, Human cytomegalovirus encodes a glycoprotein homologous to MHC class-I antigens, *Nature*, **331**, 269–272.
  25. El Hassouni, M., Henrissat, B., Chippaux, M., and Barras, F., 1992, Nucleotide sequences of the *arb* genes, which control  $\beta$ -glucoside utilization in *Erwinia chrysanthemi*, *J. Bacteriol.*, **174**, 765–777.
  26. Nelson, D. R., Kamataki, T., Waxman, D. J. et al. 1993, The P450 superfamily: Update on new sequences, gene mapping, accession numbers, early trivial names of enzymes, and nomenclature, *DNA and Cell Biology*, **12**, 1–51.
  27. Ziegler, S. F., Bird, T. A., Schneringer, J. A., Schooley, K. A., and Baum, P. R. 1993, Molecular cloning and characterization of a novel receptor protein tyrosine kinase from human placenta, *Oncogene*, **8**, 663–670.
  28. Schimmel, P. 1987, Aminoacyl tRNA synthetases: General scheme of structure-function relationships in the polypeptides and recognition of transfer RNAs, *Annu. Rev. Biochem.*, **56**, 125–158.
  29. Futai, M., Noumi, T., and Maeda, M. 1989, ATP synthase ( $H^+$ -ATPase): Results by combined biochemical and molecular biological approaches, *Annu. Rev. Biochem.*, **58**, 111–136.
  30. Koch, N., Lauer, W., Habicht, J., and Dobberstein, B. 1987, Primary structure of the gene for the murine Ia antigen-associated invariant chains (Ii). An alternatively spliced exon encodes a cysteine-rich domain highly homologous to a repetitive sequence of thyroglobulin, *The EMBO Journal*, **6**, 1677–1683.
